# Supplementary material for: Magnetic and luminescence properties of an inorganic 3D nickel–vanadium bimetallic framework
Source: Royal Society of Chemistry journal article supplement (doi:10.1039/c6nj03413f), 2016-12-22
Supplement: c6nj03413f1.pdf [file c6nj03413f1.pdf]

Electronic Supplementary Material (ESI) for New Journal of Chemistry.

This journal is © The Royal Society of Chemistry.

## *Supplementary Information*

### **Magnetic and luminescent properties of an inorganic 3D nickel–vanadium bimetallic framework**

Ning Li, Zhong Zhang, Yiwei Liu, Ying Lu, Danfeng He, Li Xu, Xiahua Zhong and Shuxia Liu\*

Key Laboratory of Polyoxometalate Science of the Ministry of Education, College of Chemistry, Northeast Normal University, Changchun, Jilin 130024, China.

**E-mail:** liusx@nenu.edu.cn

#### **Table of contents:**

1. **Fig. S1.** The 3D topology of bimetallic framework for **1**.
2. **Fig. S2.** The PXRD patterns of **1**.
3. **Fig. S3.** The IR spectra of **1**.
4. **Fig. S4.** The TG curves of **1**.
5. **Fig. S5.** The connection mode and distance of Ni<sup>2+</sup>...Ni<sup>2+</sup> and V<sup>5+</sup>...V<sup>5+</sup> in the 2D layer.
6. **Fig. S6.** The plot of  $\chi_M^{-1}$ -T for **1**.
7. **Table S1.** Bond-valence sum calculations for **1**.

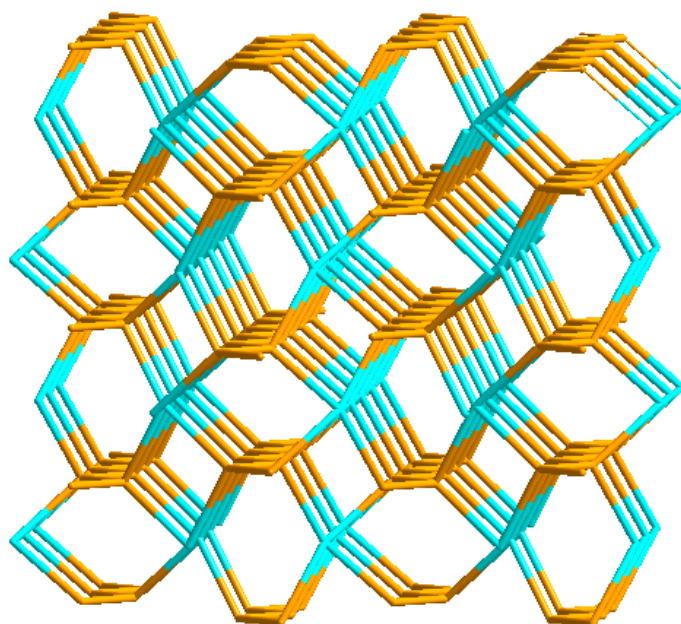

**Fig. S1.** The 3D topology of bimetallic framework for **1** (color code: VO<sub>4</sub> tetrahedron, yellow; NiO<sub>4</sub>(H<sub>2</sub>O)<sub>2</sub> octahedron, turquoise).

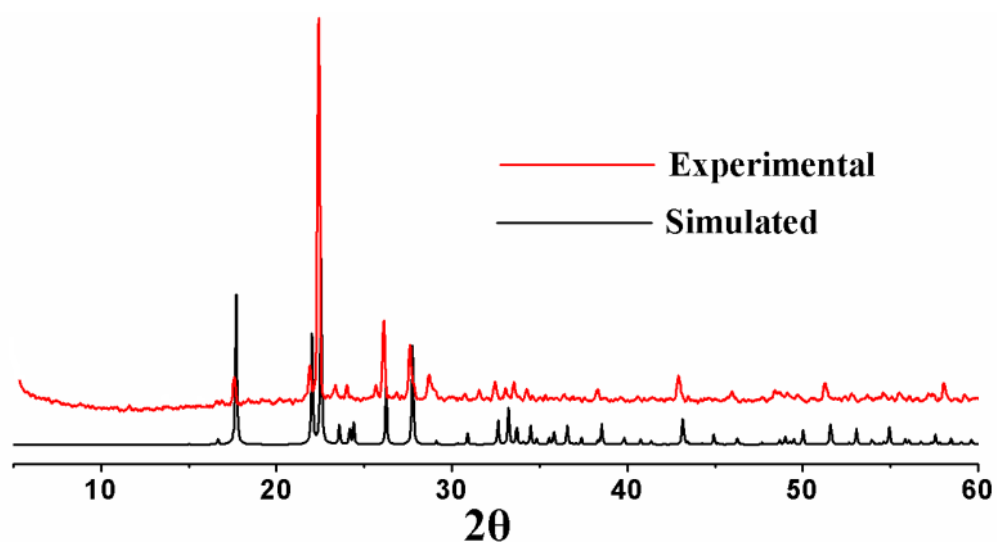

**Fig. S2.** PXRD patterns of solids **1** (black: calculated; red: as-synthesized sample, showing the powder product is in good agreement with the calculated pattern from the single-crystal X-ray diffraction).

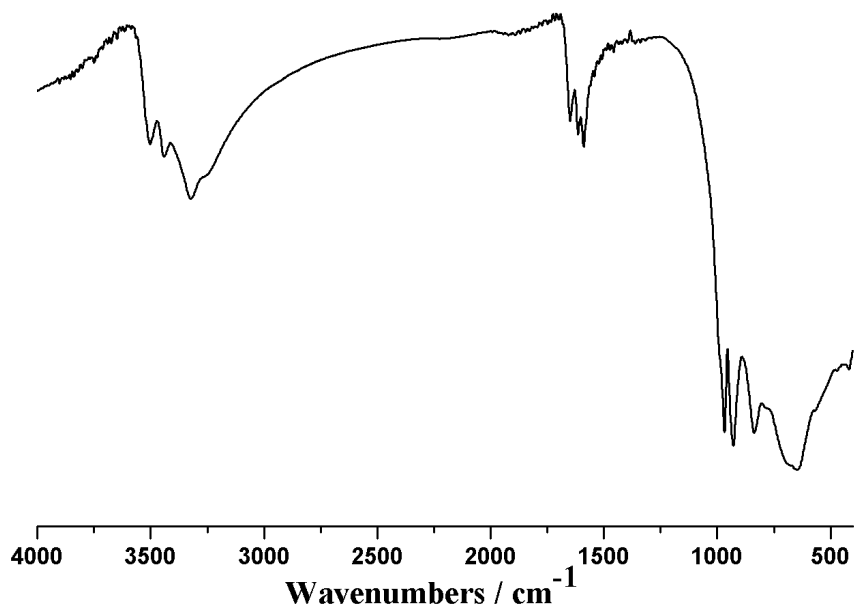

Fig. S3. The IR spectra of **1** from 4000-400 cm<sup>-1</sup>.

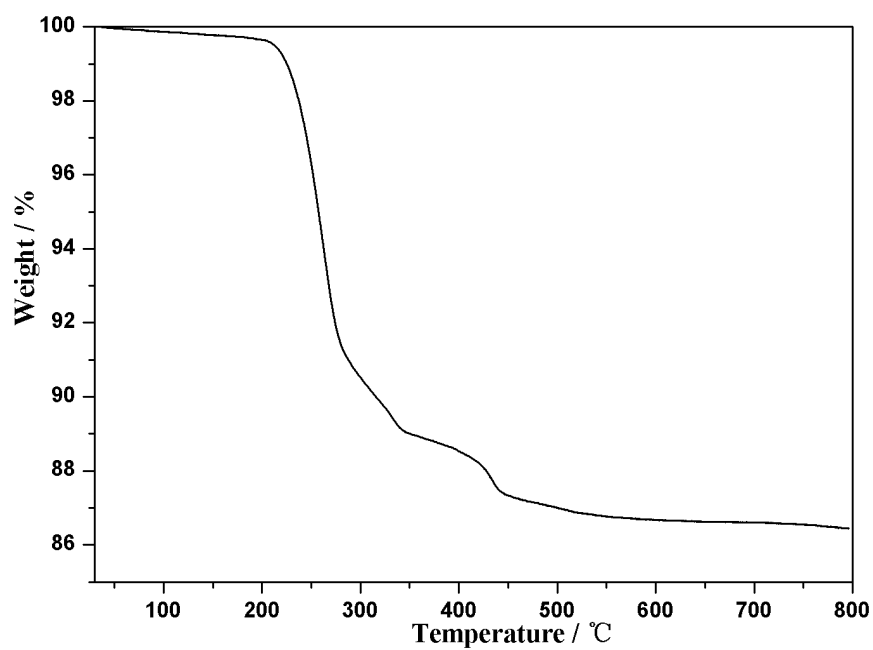

Fig. S4. The thermogravimetric (TG) curves of **1** measured from 30 to 800 °C under N<sub>2</sub> atmosphere with the heating rate of 10 °C/min.

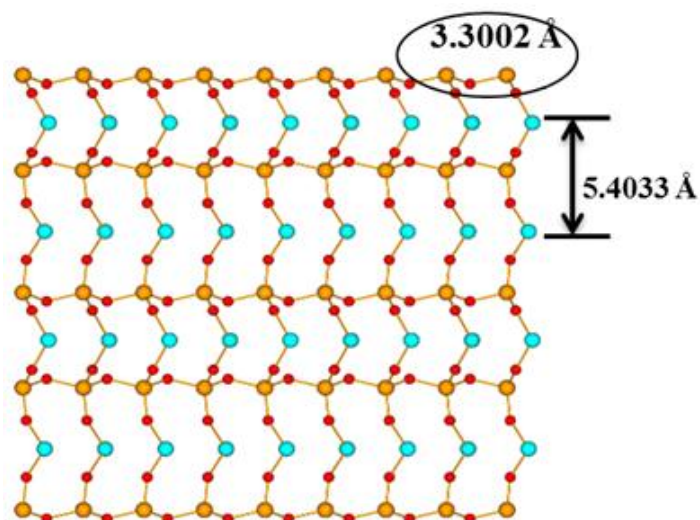

**Fig. S5.** The connection mode and distance of  $\text{Ni}^{2+}\cdots\text{Ni}^{2+}$  and  $\text{V}^{5+}\cdots\text{V}^{5+}$  in the 2D layer, the distance of  $\text{Ni}^{2+}\cdots\text{Ni}^{2+}$  and  $\text{V}^{5+}\cdots\text{V}^{5+}$  are marked.

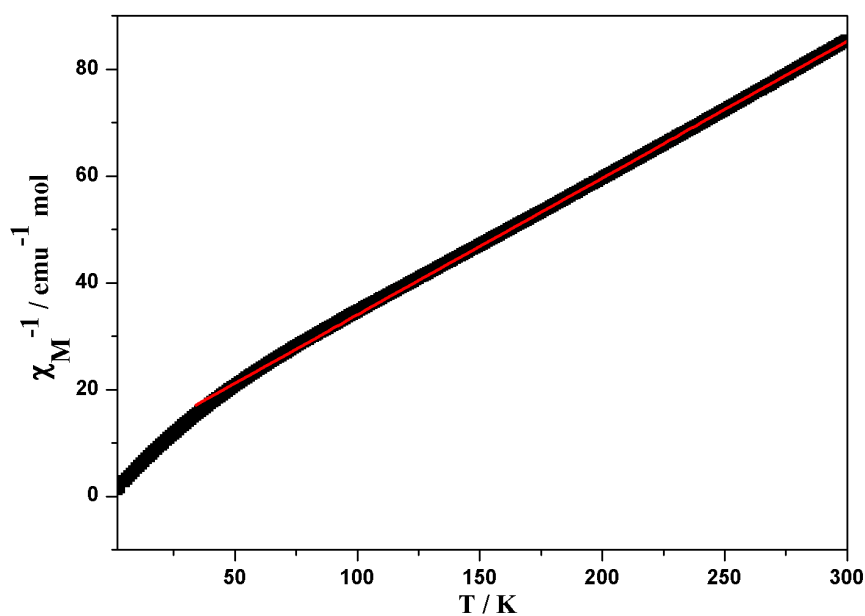

**Fig. S6.** The temperature dependence of the inverse magnetic susceptibility  $\chi_M^{-1}$  for **1** between 2 and 300 K. The solid red line was generated from the best fit by the Curie-Weiss expression in the range of 35 and 300 K with the Curie constant  $C = 3.90 \text{ emu K mol}^{-1}$  and the Weiss constant  $\theta = -32.71 \text{ K}$ .

**Table S1.** Bond-valence sum calculations for **1**.

| Bonds        | Bond length (Å) | BVS   | Bonds         | Bond length (Å) | BVS   |
|--------------|-----------------|-------|---------------|-----------------|-------|
| V(1)-O(1)    | 1.655(3)        | 1.378 | Ni(1)-O(1)    | 2.022(3)        | 0.351 |
| V(1)-O(2)    | 1.629(3)        | 1.478 | Ni(1)-O(1) #4 | 2.022(3)        | 0.351 |
| V(1)-O(3)    | 1.804(3)        | 0.921 | Ni(1)-O(2) #1 | 2.031(3)        | 0.343 |
| V(1)-O(3) #2 | 1.802(3)        | 0.926 | Ni(1)-O(2) #5 | 2.031(3)        | 0.343 |

---

|     |       |             |          |       |
|-----|-------|-------------|----------|-------|
|     |       | Ni(1)-O(1W) | 2.069(4) | 0.309 |
|     |       | Ni(1)-O(2W) | 2.034(4) | 0.340 |
| sum | 4.803 |             | sum      | 2.037 |

---
